# Supplementary material
Source: publisher site journal article supplement (https://www.dovepress.com/article/205953)
Supplement: Supplementary file 1 [file get_supplementary_file.php]

## Supplementary materials

**Figure S1.** Directed acyclic graph of suggested relation between overall mortality or disease-specific mortality and potential cofounders in patients with localized chondrosarcoma.

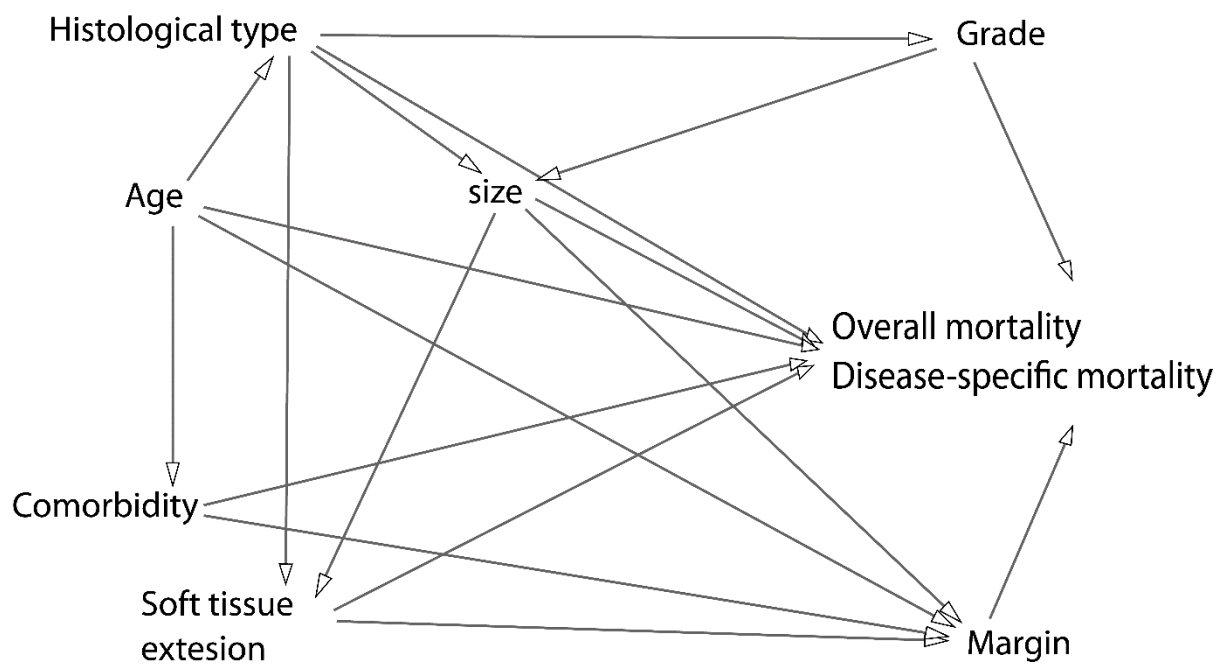

**Table S1** Medical conditions in the Charlson Comorbidity Index included in this study

| Conditions                     | Weight      |
|--------------------------------|-------------|
| Myocardial Infarct             | 1           |
| Congestive heart failure       | 1           |
| Peripheral vascular disease    | 1           |
| Cerebrovascular disease        | 1           |
| Dementia                       | 1           |
| Chronic pulmonary disease      | 1           |
| Connective tissue disease      | 1           |
| Ulcer disease                  | 1           |
| Mild liver disease             | 1           |
| Diabetes                       | 1           |
| Hemiplegia                     | 1           |
| Moderate/severe renal disease  | 2           |
| Diabetes with end organ damage | 2           |
| Any tumor*                     | 2           |
| Leukemia                       | 2           |
| Lymphoma                       | 2           |
| Moderate/severe liver disease  | 3           |
| Metastatic solid tumor         | 6           |
| AIDS                           | No patients |
